# Supplementary material for: Down regulation of p-coumarate 3-hydroxylase in petunia uniquely alters the profile of emitted floral volatiles
Source: PubMed Central journal article supplement (PMC6586934; doi:10.1038/s41598-019-45183-2), 2019-06-20
Supplement: 41598_2019_45183_MOESM1_ESM.pdf [file 41598_2019_45183_MOESM1_ESM.pdf]

## TITLE PAGE

Down regulation of *p-coumarate 3-hydroxylase* in petunia uniquely alters the profile of emitted floral volatiles

Joo Young Kim<sup>1</sup>, Robert T. Swanson<sup>1</sup>, Maria I. Alvarez<sup>1</sup>, Timothy S. Johnson<sup>1</sup>, Keun H. Cho<sup>1</sup>, David G. Clark<sup>1</sup>, and Thomas A. Colquhoun<sup>1\*</sup>

<sup>1</sup>Environmental Horticulture Department, Plant Innovation Center, Institute of Food and Agricultural Sciences, University of Florida, Gainesville, FL 32611, USA

\*Corresponding author: Thomas A. Colquhoun, University of Florida, 1523 Fifield Hall, PO Box 110670, Gainesville, FL 32611, USA, Office: 352-273-4584, Fax: 352-392-3870, email: ucntcme1@ufl.edu

### Authors' Email:

Joo Young Kim, jkim@ufl.edu

Robert T. Swanson, rswanson5335@ufl.edu

Maria I. Alvarez, ialvarez@ehs.ufl.edu

Timothy S. Johnson, timsjohnson@ufl.edu

Keun H. Cho, kencho@ufl.edu

David G. Clark, geranium@ufl.edu

Thomas A. Colquhoun, ucntcme1@ufl.edu

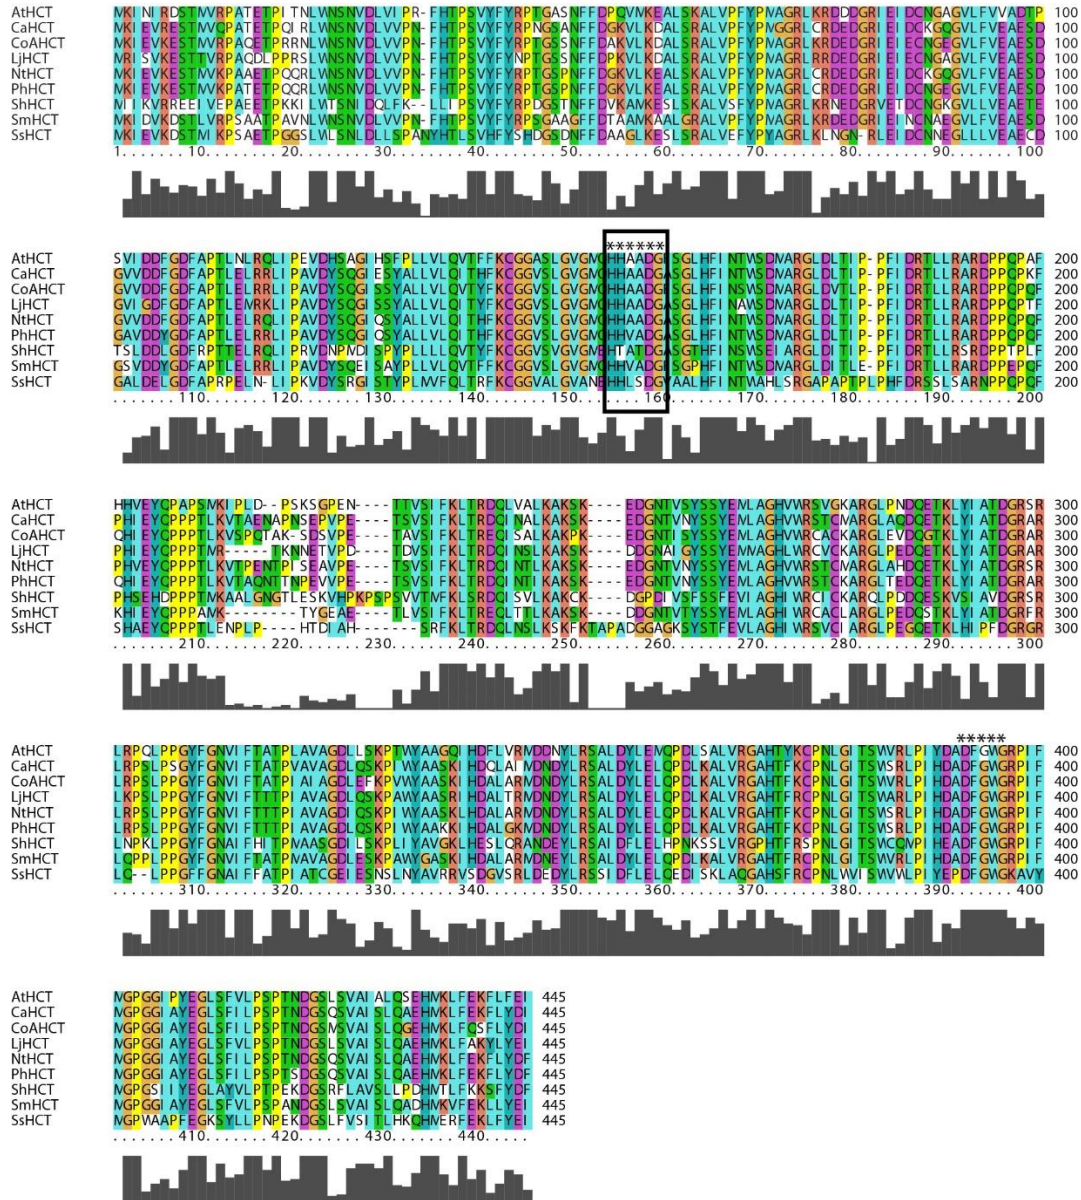

Figure S1. Predicted amino acid sequence alignment for HCT from various plants. The multiple alignment (ClustalX 2.0) was used to align the sequences. The predicted amino acids of *PhHCT* contain HHXXXD and DFGWG motifs for BAHD family.

AtHCT, *Arabidopsis thaliana* HCT (NP\_199704); CaHCT, *Capsicum annuum* HCT (NP\_001311756); CoAHCT, *Coffea arabica* HCT (CAJ40778); LjHCT, *Lonicera japonica* HCT (AFS68800); NtHCT, *Nicotiana tabacum* HCT (NP\_001312552); PhHCT, *Petunia x hybrida* HCT; ShHCT, *Sinopodophyllum hexandrum* HCT (ADB44897); SmHCT, *Salvia miltiorrhiza* HCT (ADG46003); SsHCT, *Solenostemon scutellarioides* HCT (CAK55166).

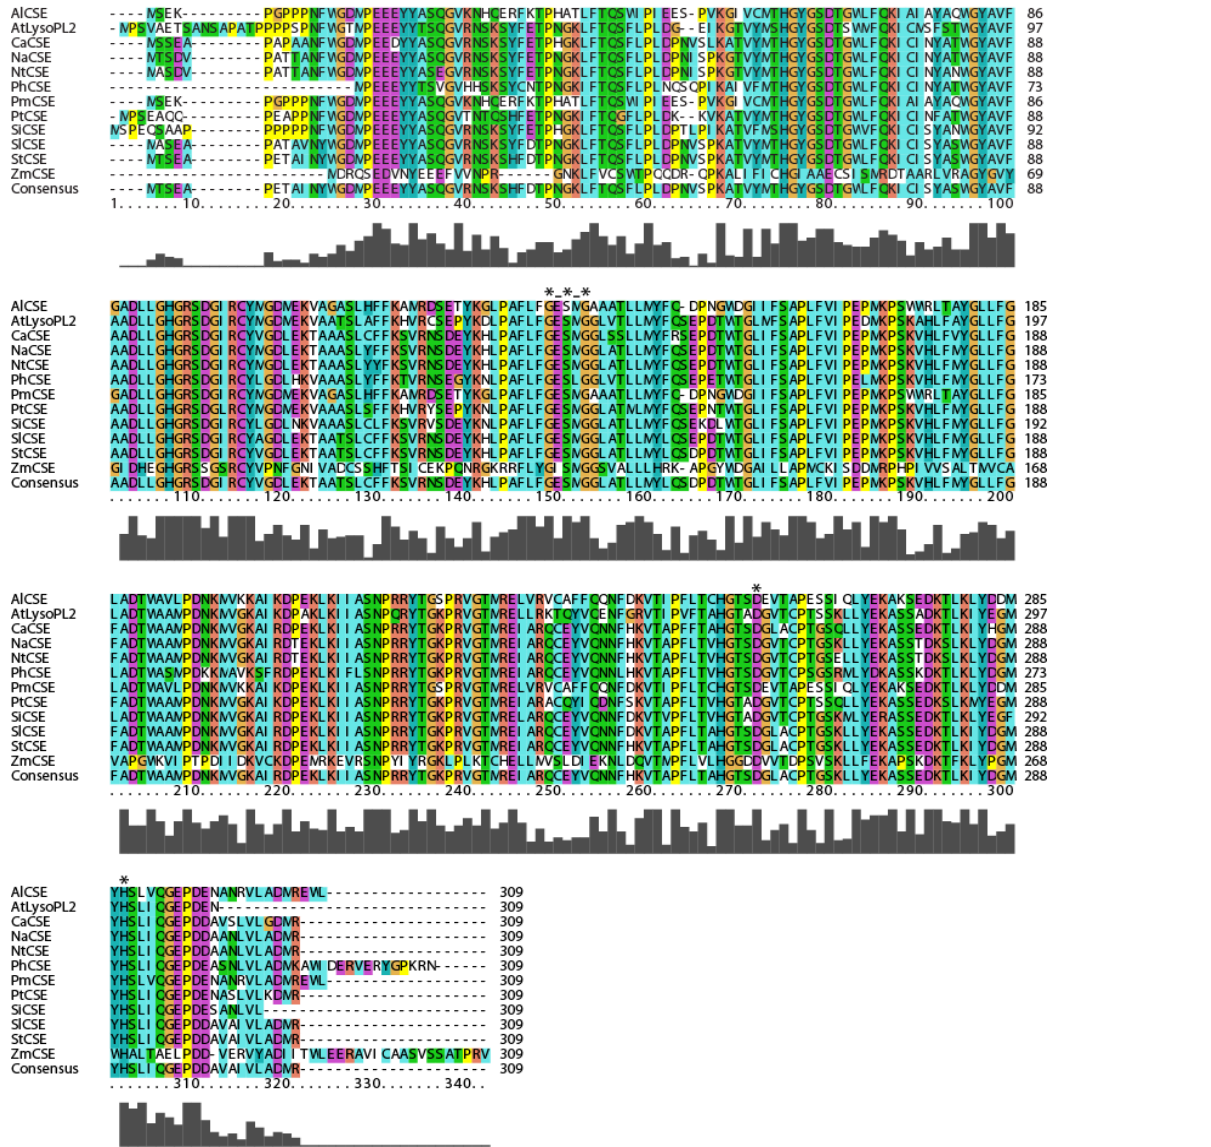

Figure S2. Predicted amino acid sequence alignment CSE from various plants. The multiple alignment (ClustalX 2.0) was used to align the sequences. The predicted amino acids of *PhCSE* contain nucleophile (GX-Nuc-XG)-acid-histidine catalytic triad which is conserved motif among members of  $\alpha/\beta$ -hydrolase family.

AICSE, *Arabidopsis lyrata* subsp. *lyrata* CSE (XP\_020891585); AtLysoPL2, *Arabidopsis thaliana* LysoPL2 (OAP14317); CaCSE, *Capsicum annuum* CSE (XP\_016562751); NaCSE, *Nicotiana attenuata* CSE (XP\_019241751); NtCSE, *Nicotiana tabacum* CSE (XP\_016470669); PmCSE, *Pinus massoniana* CSE (AKD43981); PtCSE, *Populus tomentosa* CSE (ALM55679); SiCSE, *Solanum lycopersicum* CSE (XP\_004235722); StCSE, *Solanum tuberosum* CSE (XP\_006341666); SiCSE, *Sesamum indicum* CSE (XP\_011072262); ZmCSE, *Zea mays* CSE (XP\_008674851).

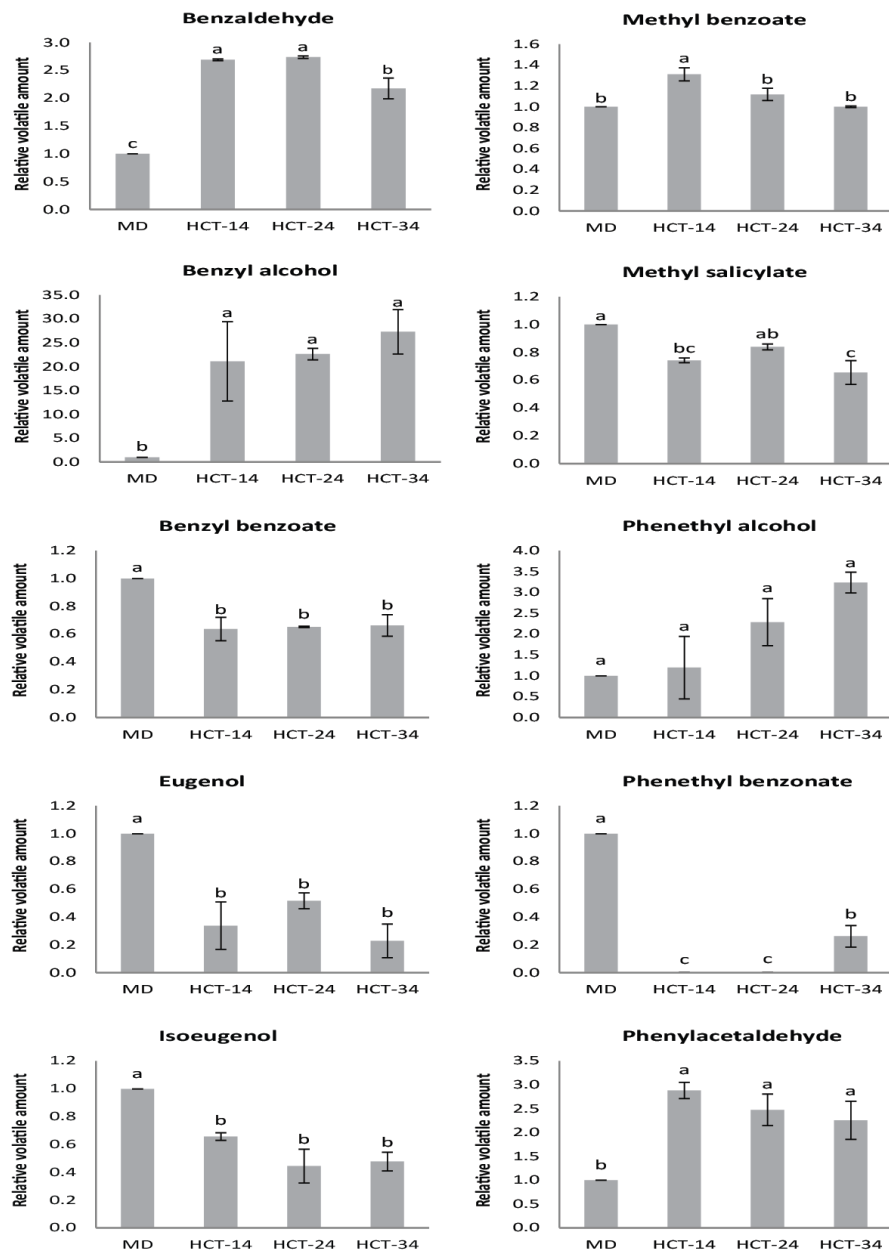

Figure S3. Effects of down-regulation of *PhHCT* on petunia floral volatiles. The open flowers (developmental stage 8) were used to collect volatiles at 18.0 h for 1hr and the calculated emission was compared to MD plants. Error bars represent standard error and means separation was analyzed by Duncan's multiple range test (one-way ANOVA,  $p < 0.05$ ).

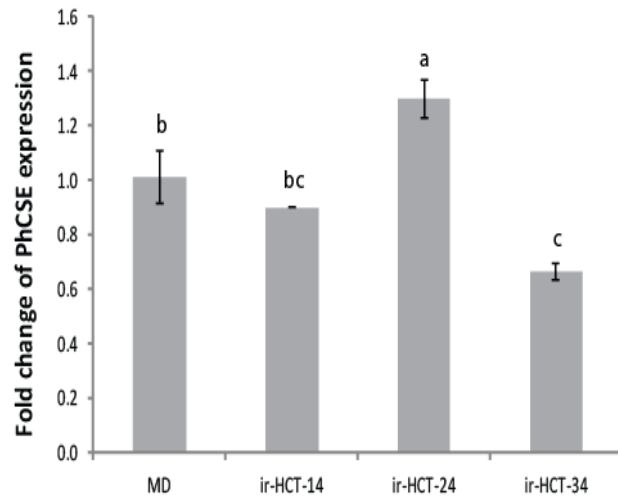

Figure S4. Transcript accumulation analysis of *phCSE* gene in *ir-PhHCT* plants. The open flowers (developmental stage 8) were used and relative quantities of the transcript of *PhCSE* gene were compared to MD plants. (q)RT-PCR was done with three biological replicates with *PhFBP1* as an internal reference. Error bars represent standard error and means separation was analyzed by Tukey test (one-way ANOVA,  $p < 0.05$ ).

Table S1. Primer sequences used in this research.

| Name        | Forward                       | Reverse                         |
|-------------|-------------------------------|---------------------------------|
| PhC3H-full  | 5'-ACATGGGGAAACCCAAAAA-3'     | 5'-TGTTTGCTCCTGGGTAATCC-3'      |
| PhHCT-full  | 5'-AGCTGTTGGAAAATCAAGAATC-3'  | 5'-GGTTTCTTTCAAAGTCATACAAGA-3'  |
| PhCSE-full  | 5'-GGACCTAATTCTGGGGTGAC-3'    | 5'-ATGCCAAAGACCAAGATGATCA-3'    |
| PhC3H-RNAi  | 5'-TTACCCGAGCCATTATGGAG-3'    | 5'-GTATGGGAGGTTGGGGAAGT-3'      |
| PhHCT-RNAi  | 5'-GGAGCTTCAGGTCTTCACTT-3'    | 5'-AGGTAACAAGCCCAGGGTTC-3'      |
|             |                               | 5'-TTGCAAGTGGATCGCCAT-3'        |
|             |                               | 5'-TTAAGCCTTCATAAGCAATA-3'      |
| PhBPBT-qPCR | 5'-AGTGATGCACCCGGTCTTGT-3'    | 5'-CAATTCTCGGCACCACACTG-3'      |
| PhBSMT-qPCR | 5'-TTTTCAGTGGAGTGCCTGGTT-3'   | 5'-GGCACCTGAGATAGCCACATG-3'     |
| PhC3H-qPCR  | 5'-CGTCTCCGTTACAAGCTTCC-3'    | 5'-AGCAGCCGATCTACTCCTATG-3'     |
| PhC4H1-qPCR | 5'-AGCAGGTGTAACAACTGCAA-3'    | 5'-AAACTGGGACAGGGATAGGA-3'      |
| PhC4H2-qPCR | 5'-AACTGTCCAAACAAAATGGA-3'    | 5'-TGGCAATTTAAAACGTTTGCT-3'     |
| PhCCR1-qPCR | 5'-CTGAGGCATCTGGTCGGTAT-3'    | 5'-TGGTTTTACCCTTGGCTTG-3'       |
| PhCCR2-qPCR | 5'-TCCACACAGCTTCACCTGTTAC-3'  | 5'-CACATCGTTGGAAAGAATTGG-3'     |
| PhCFAT-qPCR | 5'-AGGCAACTCGCAATGGAAGT-3'    | 5'-AGGCGCTGAAACACTCCAAT-3'      |
| PhCSE-qPCR  | 5'-ATTTGGGAATCACTTGGTG-3'     | 5'-CCTTGGATGGCTTCATTAGC-3'      |
| PhFBP1-qPCR | 5'-TGCGCCAATTGAGATAGCA-3'     | 5'-TGCTGAAACACTTCGCCAATT-3'     |
| PhHCT-qPCR  | 5'-GACTATGGTGAAGCCAGCAA-3'    | 5'-ACATAGCCTCCCAGCCATAG-3'      |
| PhIGS1-qPCR | 5'-AGGAAGATGTCGCAGCCTACA-3'   | 5'-GTTTGCTGCCCTTGATCAT-3'       |
| PhMYB4-qPCR | 5'-ACAATTTCTTTTGCTGCTGGAA-3'  | 5'-TTCATCGTCCTTGATTTGTTCAA-3'   |
| PhMYBA-qPCR | 5'-CCCCATATATGTGAGTTAAGTGG-3' | 5'-CCATAGGCACCTCCATGCAT-3'      |
| PhODO1-qPCR | 5'-TGCTTCAACCATGTCGAATTG-3'   | 5'-TCCGTGCCTGTTCTCTACGTT-3'     |
| PhPAAS-qPCR | 5'-CCAACCCGAACCAATTGAGA-3'    | 5'-CCTGGGAAAATATCGCTTCGA-3'     |
| PhPAL1-qPCR | 5'-GCTAGGCGGTGAGACGCTAA-3'    | 5'-CTCGGACAGCTGCACTGTCA-3'      |
| PhPAL2-qPCR | 5'-ACTGGCAGGCCTAATCCAA-3'     | 5'-GCGAAACGCTTCTTCAGCAT-3'      |
| PhPAL3-qPCR | 5'-ATGGCGAAAATGAGAAGAATG-3'   | 5'-GGCCACTAACTCATCCTCAAA-3'     |
| PhPAR-qPCR  | 5'-AAGCCATTTCCGCCAAAGTACC-3'  | 5'-GTACAGAAGCACGTTACAA-3'       |
| PhUbiq-qPCR | 5'-GTCGATGGTCTTTGTTAGTGTGT-3' | 5'-CAGAAACAGGAGCCAATTAAGCACT-3' |
